# Supplementary material for: Investigating the adsorption performance of calcium-rich biochar on CDOM from actual rifapentine pharmaceutical wastewater using spectroscopic techniques
Source: Royal Society of Chemistry journal article supplement (doi:10.1039/d4ew01002g), 2025-01-01
Supplement: d4ew01002g1.pdf [file d4ew01002g1.pdf]

## Supplementary Materials

### Text S1 Characterization and chemical analyses

The Brunauer–Emmett–Teller (BET) surface area, pore size distribution, and pore volume of biochar were measured according to the N<sub>2</sub> adsorption–desorption isotherm at 77 K (Quantachrome, Autosorb EVO, USA). The surface morphologies and crystalline phases of the adsorbents were characterized by scanning electron microscopy (SEM) (S-4800, Hitachi, Japan) and X-ray diffraction (XRD) (Smartlab 9, Rigaku Corporation, Japan), respectively.

Rifampicin wastewater solution was filtered through Whatman GF/F filters with a nominal pore size 0.45- $\mu$ m to obtain the DOM solution. Dissolved organic carbon (DOC) was measured by a TOC-L analyzer (Shimadzu Inc., Japan) as DOM content. Chemical oxygen demand (COD) was measured using a fast confined catalytic digestion-spectrophotometer method. Potassium dichromate was used as oxidant and mercury sulfate as a screening agent was used to remove main disturbing ion, chlorine ion.

UV–Vis spectra of DOM was collected using a Shimadzu UV-2600 spectrophotometer at 25 °C. The wavelength range was set from 200 to 600 nm with a 1 nm intervals. Ultrapure water (Milli-Q) was used for the blank reference. Absorbance values at 355 nm ( $a_{355}$ ) and 254 nm ( $UV_{254}$ ) were used to quantify the relative content of CDOM and aromatic structures in rifampicin wastewater. SFS of CDOM were collected using a molecular fluorescence spectrometer (F-7000, Hitachi, Japan) in the range of 250–600 nm with a constant offset of 40 nm. Raman scattering was eliminated by deducting ultrapure water (Milli-Q) as a blank subtraction. Solid powders were collected by freeze-drying the CDOM solutions for FTIR analysis using a Nicolet Nexus FTIR spectrometer.

## Figures

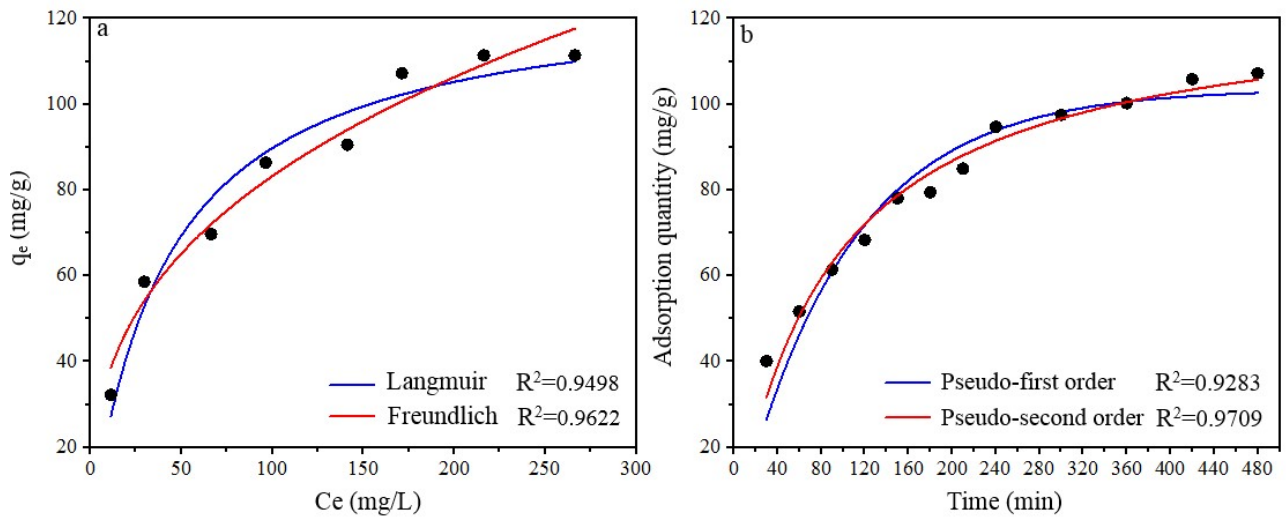

Fig. S1 The adsorption isotherm model (a) and kinetics model (b)

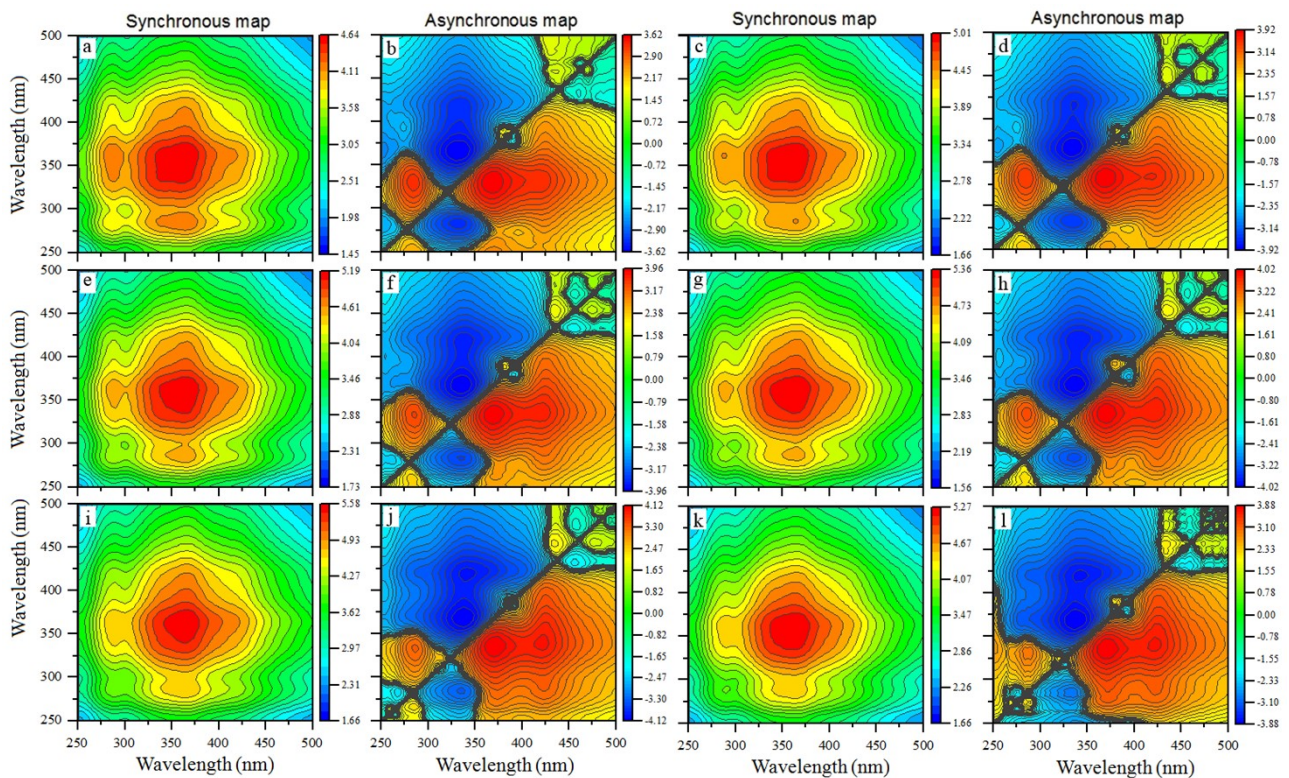

Fig. S2 2D-COS maps of rifampicin wastewater adsorbed by CSB in different COD concentrations: (a, b) 150 mg/L; (c, d) 200 mg/L; (e, f) 250 mg/L; (g, h) 300 mg/L; (i, j) 350 mg/L; and (k, l) 400 mg/L;

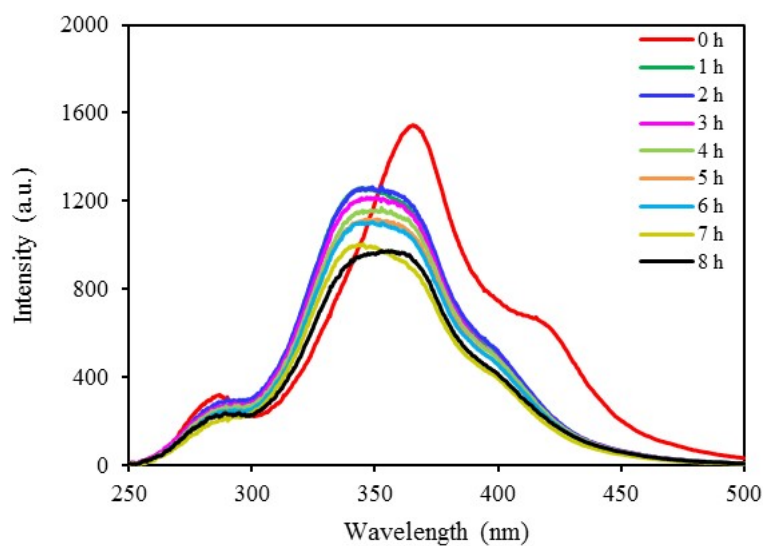

Fig. S3 The changes of fluorescent CDOM in adsorption dynamics process (COD=300 mg/L)

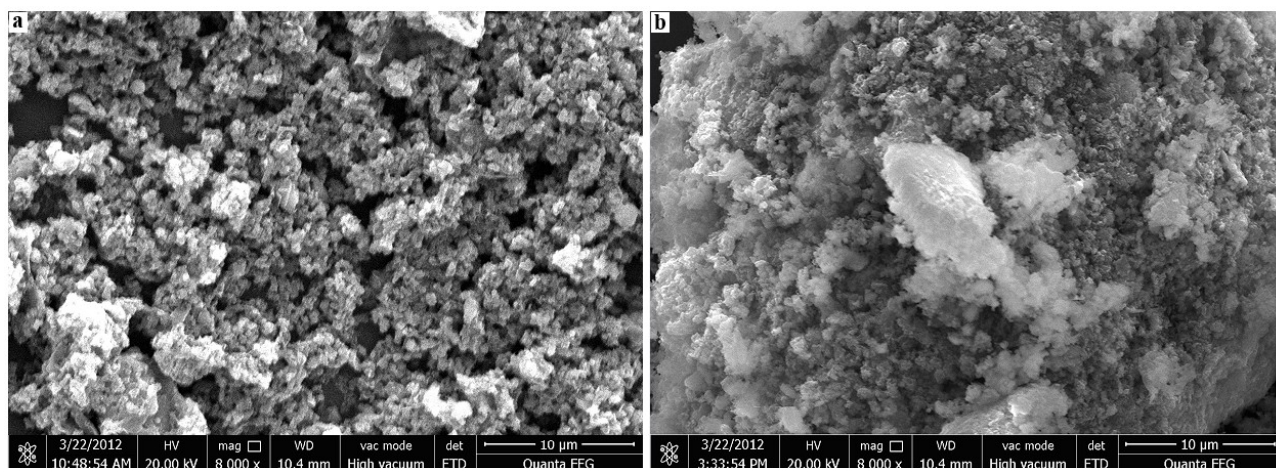

Fig. S4 SEM of CSB (a) before adsorption; (b) after adsorption

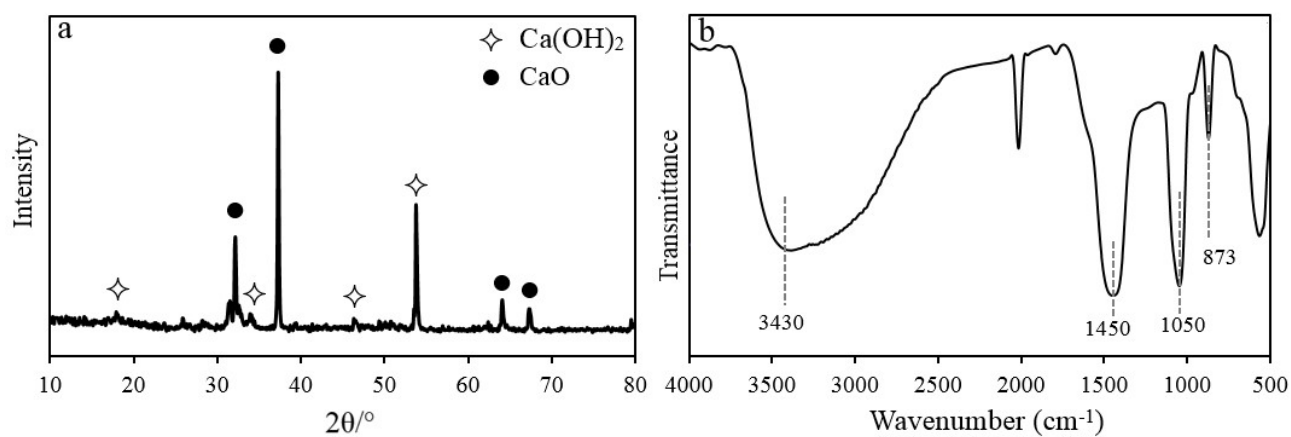

Fig S5 XRD and FTIR of CSB

## Tables

Table S1 The positive and negative correlation coefficient of cross-peaks identified by the 2D-SFS-COS

| $\begin{matrix} x1 \\ \backslash \\ x2 \end{matrix}$ | 334 | 367 | 375 | 390 | 402 | 422 | 465 |
|------------------------------------------------------|-----|-----|-----|-----|-----|-----|-----|
| 284                                                  | -   | +   | +   | +   | +   | +   | +   |
| 334                                                  |     | +   | +   | +   | +   | +   | +   |
| 367                                                  |     |     | +   | -   | +   | +   | -   |
| 375                                                  |     |     |     | -   | -   | +   | -   |
| 390                                                  |     |     |     |     | +   | +   | -   |
| 402                                                  |     |     |     |     |     | +   | -   |
| 422                                                  |     |     |     |     |     |     | -   |

1450

cm<sup>-1</sup>

(carboxyl  $\delta_{\text{O-H}}$ , alkane  $\delta_{\text{CH}_3}$  or skeleton vibration  $\nu_{\text{C=C}}$ ), 1050 cm<sup>-1</sup> (alcohol or ethers  $\nu_{\text{C-O}}$ ), 873 cm<sup>-1</sup> (the rocking vibration of CaO, nitro-compounds  $\nu_{\text{C-N}}$ ), 920 cm<sup>-1</sup> (carboxyl  $\gamma_{\text{C-OH}}$ ), 1225 cm<sup>-1</sup> (aryl group  $\nu_{\text{C-N}}$ , phenolic  $\nu_{\text{C-O}}$ ), 722 cm<sup>-1</sup> (amide  $\gamma_{\text{N-H}}$ ), and 1700-2000 cm<sup>-1</sup> (carbonyl group  $\nu_{\text{C=O}}$ ).

Table S2 2D-FTIR-COS results on the assignment of cross- and auto- peaks in synchronous and asynchronous maps.

| Wavenumber (cm <sup>-1</sup> ) | Assignment                                                                                              |
|--------------------------------|---------------------------------------------------------------------------------------------------------|
| 1700-2000                      | carbonyl group $\nu_{\text{C=O}}$                                                                       |
| 1450                           | carboxyl $\delta_{\text{O-H}}$ , alkane $\delta_{\text{CH}_3}$ or skeleton vibration $\nu_{\text{C=C}}$ |
| 1225                           | aryl group $\nu_{\text{C-N}}$ , phenolic $\nu_{\text{C-O}}$                                             |
| 1050                           | alcohol or ethers $\nu_{\text{C-O}}$                                                                    |
| 920                            | carboxyl $\gamma_{\text{C-OH}}$                                                                         |
| 873                            | the rocking vibration of CaO, nitro-compounds $\nu_{\text{C-N}}$                                        |
| 722                            | amide $\gamma_{\text{N-H}}$                                                                             |

Table S3 The positive and negative correlation coefficient of cross-peaks identified by the 2D-FTIR-COS

| $\begin{matrix} x1 \\ \backslash \\ x2 \end{matrix}$ | 873 | 914 | 1050 | 1225 | 1450 | 1700-2000 |
|------------------------------------------------------|-----|-----|------|------|------|-----------|
| 722                                                  | +   | +   | +    | +    | +    | -         |
| 873                                                  |     | -   | +    | -    | +    | -         |
| 914                                                  |     |     | +    | -    | +    | -         |
| 1050                                                 |     |     |      | -    | +    | -         |
| 1225                                                 |     |     |      |      | +    | -         |
| 1450                                                 |     |     |      |      |      | -         |

Table S4 BET parameters of CSB before and after adsorption

| Sample | BET (m <sup>2</sup> /g) | Pore volume (cm <sup>3</sup> /g) | Pore size (Å) |
|--------|-------------------------|----------------------------------|---------------|
| Before | 111.86                  | 0.614                            | 219.31        |
| After  | 61.41                   | 0.476                            | 167.88        |
